# Supplementary material for: Ultrathin SmVO4 nanosheets: ionic liquid–assisted hydrothermal synthesis, characterization, formation mechanism and optical property
Source: Royal Society of Chemistry journal article supplement (doi:10.1039/c002626c), 2010-01-01
Supplement: c002626c.pdf [file c002626c.pdf]

**Electronic Supplementary Information**  
**Ultrathin SmVO<sub>4</sub> Nanosheets: Ionic Liquid–Assisted  
Hydrothermal Synthesis, Characterization, Formation  
Mechanism and Optical Property**

*Yan Sun, and Wenjun Zheng\**

Department of Materials Chemistry and Key Laboratory of Energy-Material  
Chemistry (Tianjin), College of Chemistry, Nankai University, Tianjin 300071,  
People's Republic of China

\*Corresponding author. Fax: +86-22-23502458.

E-mail: zhwj@nankai.edu.cn, juzi147@yahoo.com.cn.

**Table S1.** Summary of the experimental parameters, morphology and phase composition of the corresponding products

| Sample | reaction conditions         |    |               |              | morphology                                      | phase                                                         |
|--------|-----------------------------|----|---------------|--------------|-------------------------------------------------|---------------------------------------------------------------|
|        | the amount of [BMIM]Br (mL) | pH | <i>T</i> (°C) | <i>t</i> (h) |                                                 |                                                               |
| 1      | 0                           | 11 | 180           | 48           | irregular nanoparticles and sheet-like crystals | <i>t</i> -SmVO <sub>4</sub>                                   |
| 2      | 0.75                        | 11 | 180           | 48           | sheet-like crystals                             | <i>t</i> -SmVO <sub>4</sub>                                   |
| 3      | 3.0                         | 11 | 180           | 48           | nanosheets                                      | <i>t</i> -SmVO <sub>4</sub>                                   |
| 4      | 6.0                         | 11 | 180           | 48           | microscale sheets and particles                 | <i>t</i> -SmVO <sub>4</sub>                                   |
| 5      | 1.5                         | 11 | 120           | 48           | nanosheets                                      | <i>t</i> -SmVO <sub>4</sub> and <i>h</i> -Sm(OH) <sub>3</sub> |
| 6      | 1.5                         | 11 | 150           | 48           | nanosheets                                      | <i>t</i> -SmVO <sub>4</sub> and <i>h</i> -Sm(OH) <sub>3</sub> |
| 7      | 1.5                         | 11 | 200           | 48           | nanosheets                                      | <i>t</i> -SmVO <sub>4</sub> and <i>h</i> -Sm(OH) <sub>3</sub> |
| 8      | 1.5                         | 1  | 180           | 48           | bulk particles                                  | <i>t</i> -SmVO <sub>4</sub> and VO <sub>0.53</sub>            |
| 9      | 1.5                         | 5  | 180           | 48           | bulk particles                                  | <i>t</i> -SmVO <sub>4</sub> and VO <sub>0.53</sub>            |
| 10     | 1.5                         | 7  | 180           | 48           | nanoparticles                                   | <i>t</i> -SmVO <sub>4</sub> and <i>h</i> -Sm(OH)              |
| 11     | 1.5                         | 9  | 180           | 48           | nanosheets                                      | <i>t</i> -SmVO <sub>4</sub>                                   |
| 12     | 1.5                         | 13 | 180           | 48           | square-like microcrystals                       | <i>t</i> -SmVO <sub>4</sub> and <i>h</i> -Sm(OH)              |
| 13     | 1.5                         | 11 | 180           | 1            | nanoparticles                                   | <i>h</i> -Sm(OH) <sub>3</sub>                                 |
| 14     | 1.5                         | 11 | 180           | 4            | nanoparticles and nanosheets                    | <i>h</i> -Sm(OH) <sub>3</sub>                                 |
| 15     | 1.5                         | 11 | 180           | 8            | nanosheets                                      | <i>t</i> -SmVO <sub>4</sub> and <i>h</i> -Sm(OH) <sub>3</sub> |
| 16     | 1.5                         | 11 | 180           | 12           | nanosheets                                      | <i>t</i> -SmVO <sub>4</sub> and <i>h</i> -Sm(OH) <sub>3</sub> |
| 17     | 1.5                         | 11 | 180           | 16           | nanosheets                                      | <i>t</i> -SmVO <sub>4</sub> and <i>h</i> -Sm(OH) <sub>3</sub> |
| 18     | 1.5                         | 11 | 180           | 32           | nanosheets                                      | <i>t</i> -SmVO <sub>4</sub> and <i>h</i> -Sm(OH) <sub>3</sub> |

**Table S2.** EDX determined elemental composition of the synthesized *t*-SmVO<sub>4</sub> nanosheets

| Element | Weight % | Atomic % | Uncertainty % | Detector Correction | k-Factor | Absorption Correction |
|---------|----------|----------|---------------|---------------------|----------|-----------------------|
| O(K)    | 25.794   | 69.305   | 0.409         | 0.495               | 2.059    | 0.921                 |
| V(K)    | 16.997   | 14.343   | 0.215         | 0.994               | 1.353    | 0.997                 |
| Sm(L)   | 57.208   | 16.351   | 0.552         | 0.807               | 4.380    | 0.997                 |

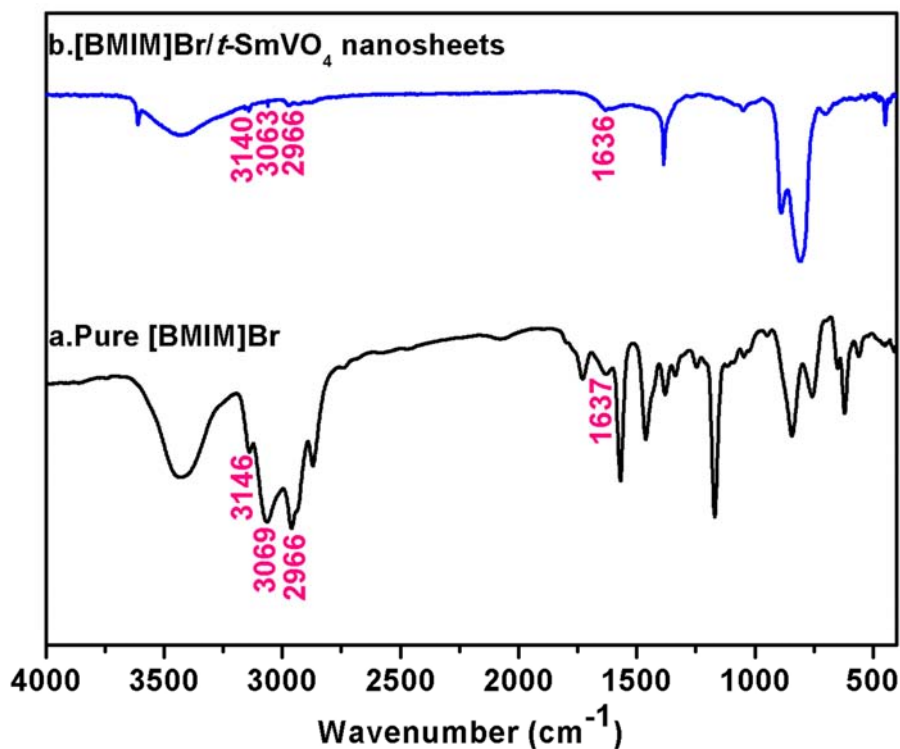

**Figure S1.** FT-IR spectra of pure [BMIM]Br (a) and [BMIM]Br/*t*-SmVO<sub>4</sub> nanosheets (b).

**Table S3.** FT-IR Absorption frequencies for Pure [BMIM]Br and [BMIM]Br/*t*-SmVO<sub>4</sub> nanosheets  
frequencies of absorption bands (cm<sup>-1</sup>)

| [BMIM]Br   | [BMIM]Br/ <i>t</i> -SmVO <sub>4</sub> nanosheets | assignments                                    |
|------------|--------------------------------------------------|------------------------------------------------|
| 3146, 3069 | 3140, 3063                                       | C(2)-H of imidazole ring stretching vibration  |
| 2966       | 2966                                             | C-H bonds of alkyl chains stretching vibration |
| 1637       | 1636                                             | C=C stretching vibration of imidazole ring     |

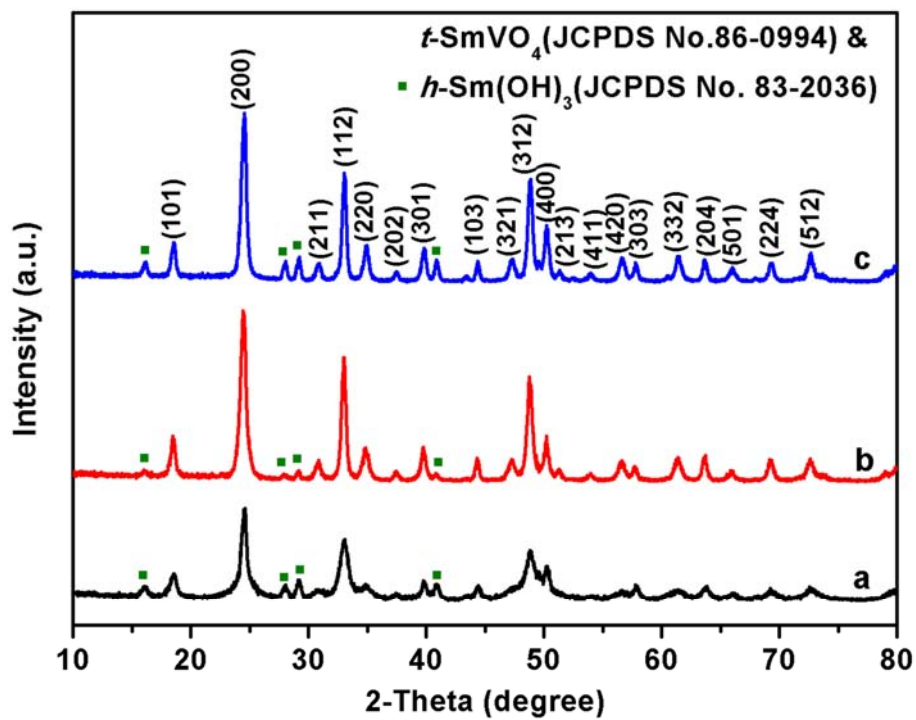

**Figure S2.** XRD patterns of the products prepared at different temperatures (48 h, 1.5 mL of [BMIM]Br (0.01 M), pH = 11): (a) 120 °C, (b) 150 °C, (c) 200 °C.

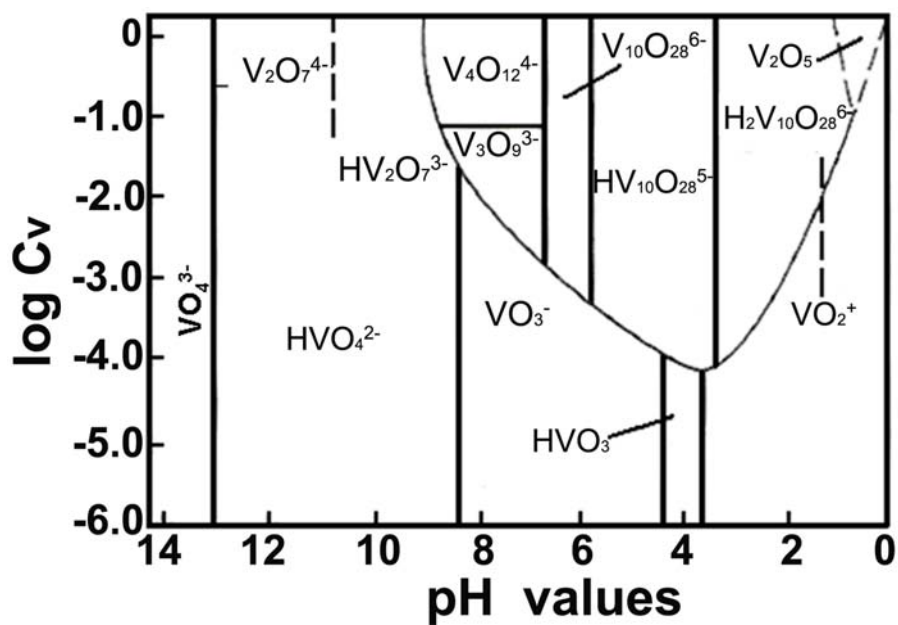

Figure S3. The relationships of V ions at various pH are given.<sup>S1</sup>

(S1) S. L. Yang, G. Q. Liu, and H. S. Chen, Vanadium and titanium materials, Metallurgical Industry Press, 2007, Chapter 3

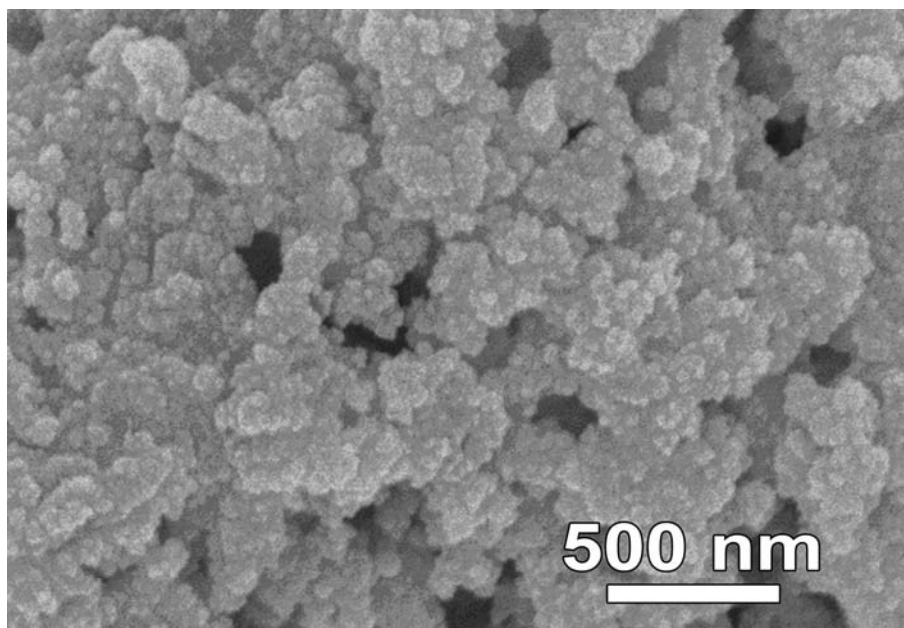

**Figure S4.** SEM image of the product obtained under pH = 5 at 180 °C for 48 h with 1.5 mL of [BMIM]Br (0.01 M) presented.

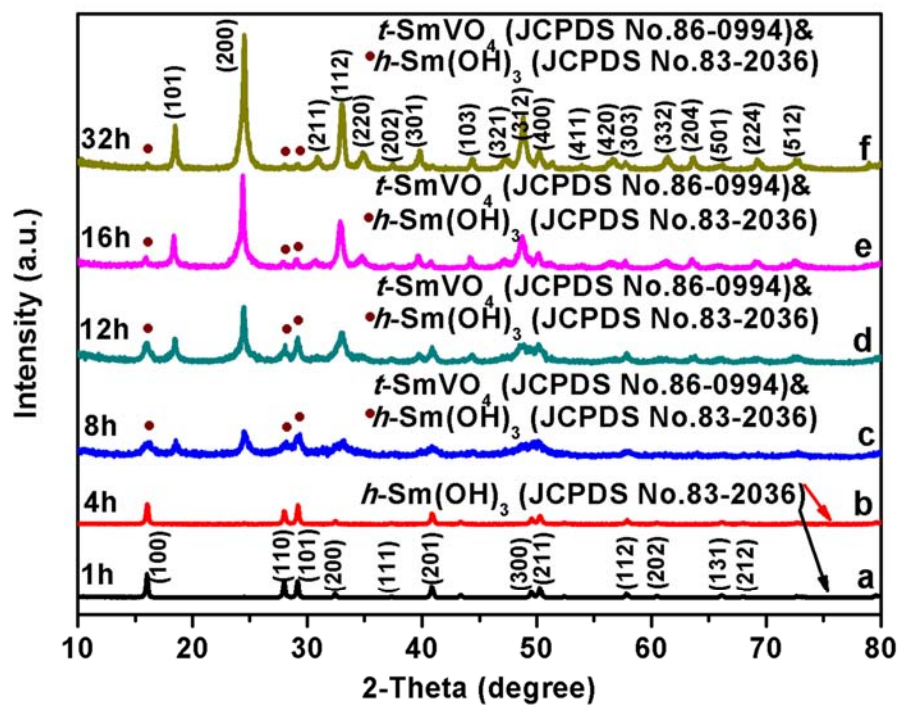

**Figure S5.** XRD patterns of the samples obtained at different reaction intervals using 1.5 mL of [BMIM]Br (0.01 M) at 180 °C and pH = 11: (a) 1 h; (c) 8 h; (d) 12h; (e)16 h; (f) 32 h.



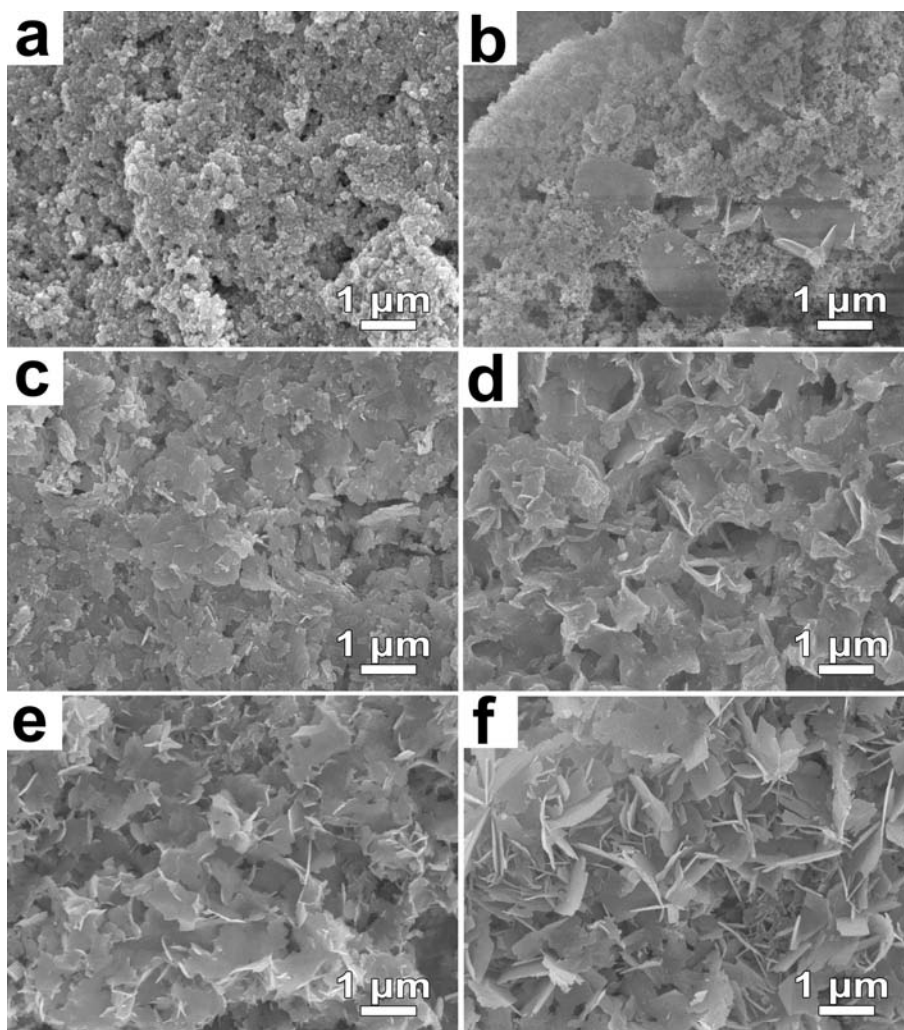

**Figure S6.** SEM images of the samples obtained under different reaction time using 1.5 mL of [BMIM]Br (0.01 M) at 180 °C and pH = 11: (a) 1 h, *h*-Sm(OH)<sub>3</sub> nanoparticles; (b) 4 h, *h*-Sm(OH)<sub>3</sub> nanoparticles and nanosheets; (c) 8 h, a mixture of *t*-SmVO<sub>4</sub> and *h*-Sm(OH)<sub>3</sub> nanosheets with the thickness of 40 nm; (d) 12 h, a mixture of *t*-SmVO<sub>4</sub> and *h*-Sm(OH)<sub>3</sub> nanosheets with the thickness of 30 nm; (e) 16 h, a mixture of *t*-SmVO<sub>4</sub> and *h*-Sm(OH)<sub>3</sub> nanosheets with the thickness of 25 nm; (f) 32 h, a mixture of *t*-SmVO<sub>4</sub> and *h*-Sm(OH)<sub>3</sub> nanosheets with the thickness of 20 nm.
